# Supplementary material for: MicroRNA-30 regulates left ventricular hypertrophy in chronic kidney disease
Source: JCI journal article supplement (doi:10.1172/jci.insight.138027), 2021-04-13
Supplement: sd1 [file 1]

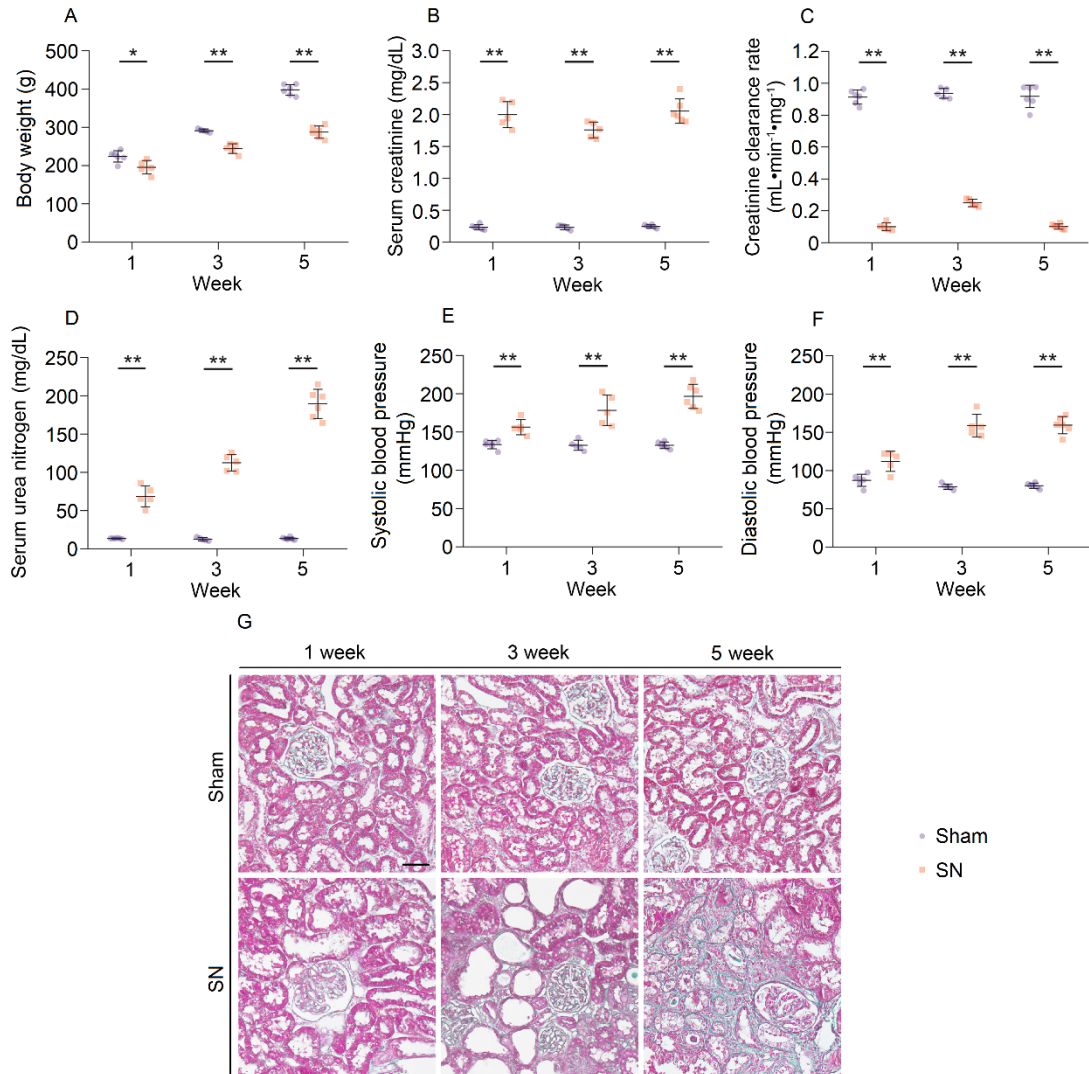

1  
2 **Supplemental Figure 1. SN rats gradually evolve into CKD. (A)** Nephrectomized  
3 rats exhibit a delayed body growth. \* $P < 0.05$  and \*\* $P < 0.01$  compared with values for  
4 the sham indicated by the dashed line, by Two-tailed, unpaired Student's  $t$  test. Data are  
5 shown as mean  $\pm$  SD.  $n = 5$  or 6 rats per group. **(B)** Nephrectomy causes obvious  
6 increase in serum creatinine. \*\* $P < 0.01$  compared with values for the sham indicated by  
7 the dashed line, by Two-tailed, unpaired Student's  $t$  test. Data are shown as mean  $\pm$  SD.  
8  $n = 5$  or 6 rats per group. **(C)** Creatinine clearance rate indicates a marked decrease in  
9 SN rats. \*\* $P < 0.01$  compared with values for the sham indicated by the dashed line, by  
10 Two-tailed, unpaired Student's  $t$  test. Data are shown as mean  $\pm$  SD.  $n = 5$  or 6 rats per

1 group. **(D)** Nephrectomy causes obvious increase in serum creatinine urea nitrogen.  
2 **\*\*P<0.01** compared with values for the sham indicated by the dashed line, by Two-  
3 tailed, unpaired Student's *t* test. Data are shown as mean  $\pm$  SD. n = 5 or 6 rats per group.  
4 **(E~F)** Blood pressure shows a gradually increasing trend in nephrectomized rats.  
5 **\*\*P<0.01** compared with values for the sham indicated by the dashed line, by Two-  
6 tailed, unpaired Student's *t* test. Data are shown as mean  $\pm$  SD. n = 5 or 6 rats per group.  
7 **(G)** Representative histology of remnant kidney reveals a trend of gradual tubular  
8 dilation and interstitial fibrosis in nephrectomized rats. (original magnification,  $\times 100$ ;  
9 scale bar: 100 nm)

10  
11  
12  
13  
14  
15  
16  
17  
18  
19

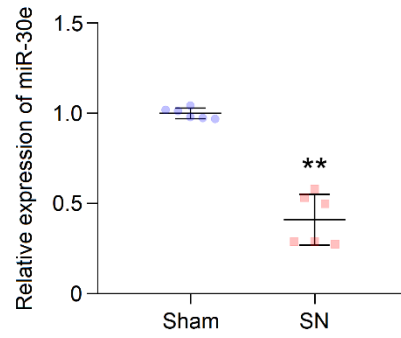

1

2 **Supplemental Figure 2. SN rats demonstrate cardiac miR-30e suppression at 5**

3 **weeks after nephrectomy.** Expression levels are normalized by *U6*. \*\*P<0.01

4 compared with values for the sham, by Two-tailed, unpaired Student's *t* test. Data are

5 shown as mean  $\pm$  SD. n = 6 rats per group.

6

7

8

9

10

11

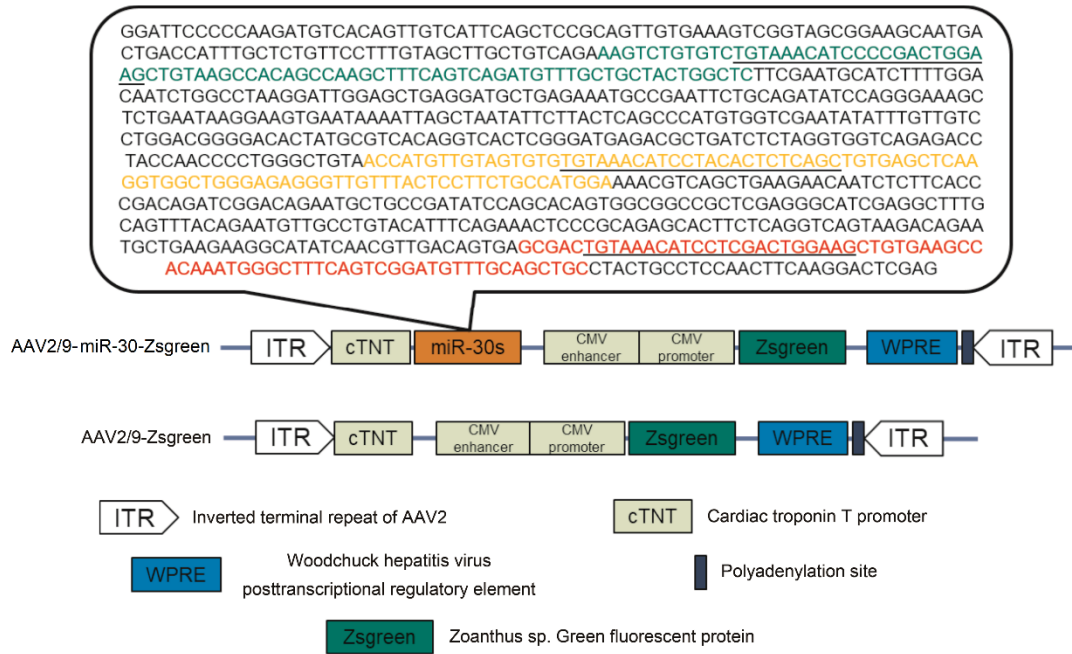

1

2 **Supplemental Figure 3. The genome structure of AAV2/9.** Alphabets with green

3 font, yellow font and red font represent pre-miR-30d, pre-miR-30c and pre-miR-30a,

4 respectively. Underlined letters among them mean mature miR-30d, miR-30c and

5 miR-30a.

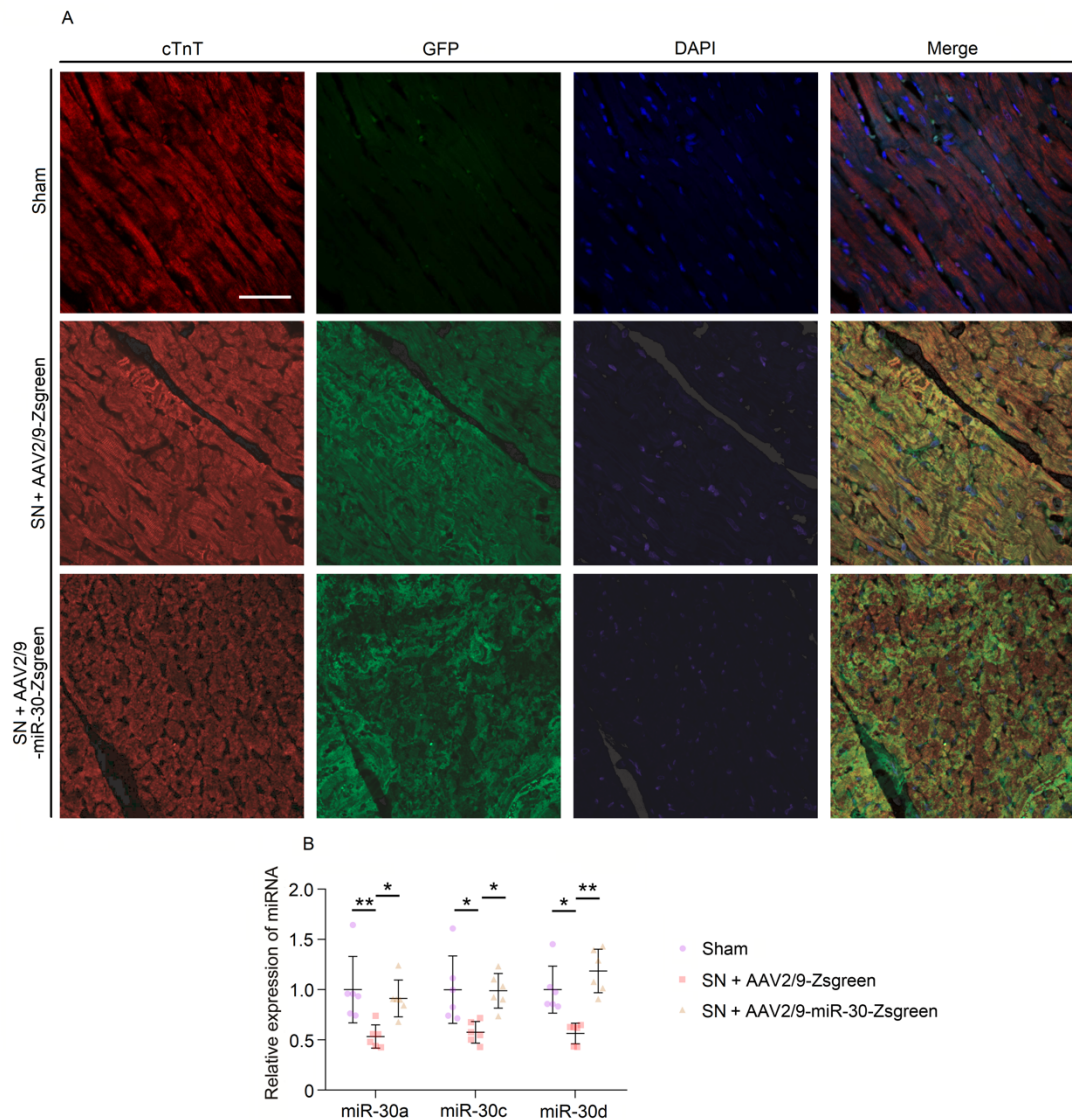

1

2 **Supplemental Figure 4. AAV2/9-transfected cardiac tissues successfully express**

3 **miR-30. (A)** Zsgreen expresses in cardiomyocytes of rats received AAV2/9 injection

4 (original magnification,  $\times 400$ ; scale bar: 50 nm). **(B)** AAV2/9-miR-30-Zsgreen

5 injection successfully rescues the downregulation of miR-30 in cardiomyocytes of SN

6 rats. Expression levels are normalized by *U6*. \* $P < 0.05$  and \*\* $P < 0.01$  compared with

7 values indicated by the dashed line, by One-way ANOVA test. Tukey's multiple

8 comparisons test was used for multiple comparison. Data are shown as mean  $\pm$  SD. n

9 = 6 rats per group.

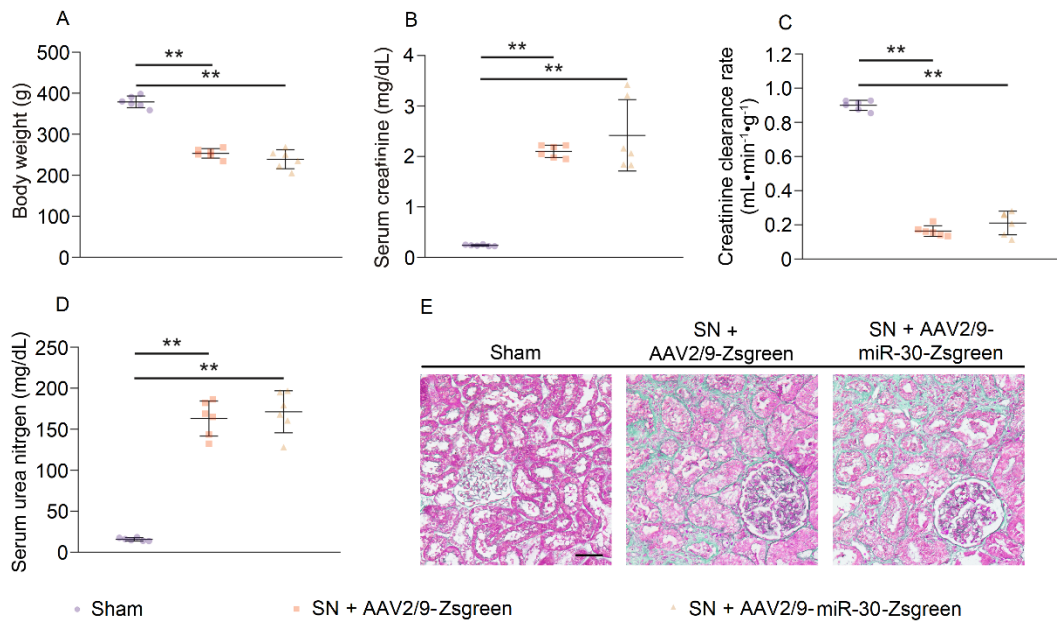

1

2 **Supplemental Figure 5. AAV2/9 injection does not alternate CKD progression.**

3 **(A~D)** AAV2/9 injection does not affect body weight reduction, serum creatinine

4 increment, creatinine clearance rate reduction and serum urea nitrogen increment in

5 SN rats. \*\*P<0.01 compared with values indicated by the dashed line, by One-way

6 ANOVA test. Tukey's multiple comparisons test was used for multiple comparison.

7 Data are shown as mean ± SD. n = 6 rats per group. **(E)** No reduction in renal fibrosis

8 or morphology changed in nephrectomized groups after AAV2/9 injection (original

9 magnification, ×100; scale bar: 100 nm).

10

11

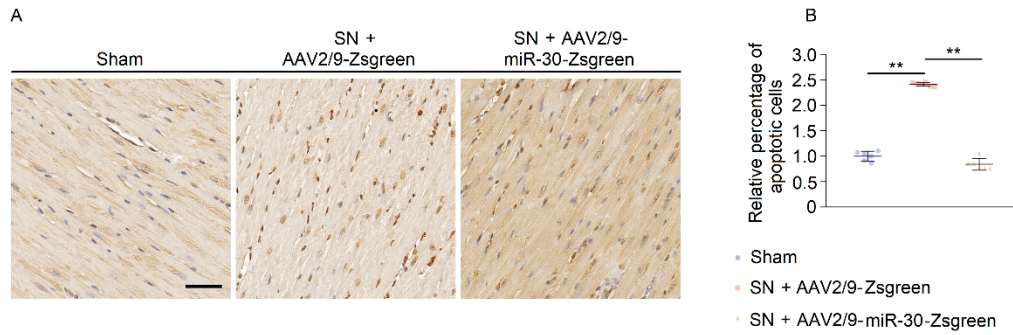

1

2 **Supplemental Figure 6. Cardiac miR-30 rescue mitigates cardiomyocyte**

3 **apoptosis in CKD. (A)** Representative images of TUNNEL staining (original

4 magnification, ×400; scale bar: 50 nm). **(B)** Quantitative results for TUNNEL

5 staining. \*\*P<0.01 compared with values indicated by the dashed line, by One-way

6 ANOVA test. Tukey's multiple comparisons test was used for multiple comparison.

7 Data are shown as mean ± SD. n = 6 rats per group.

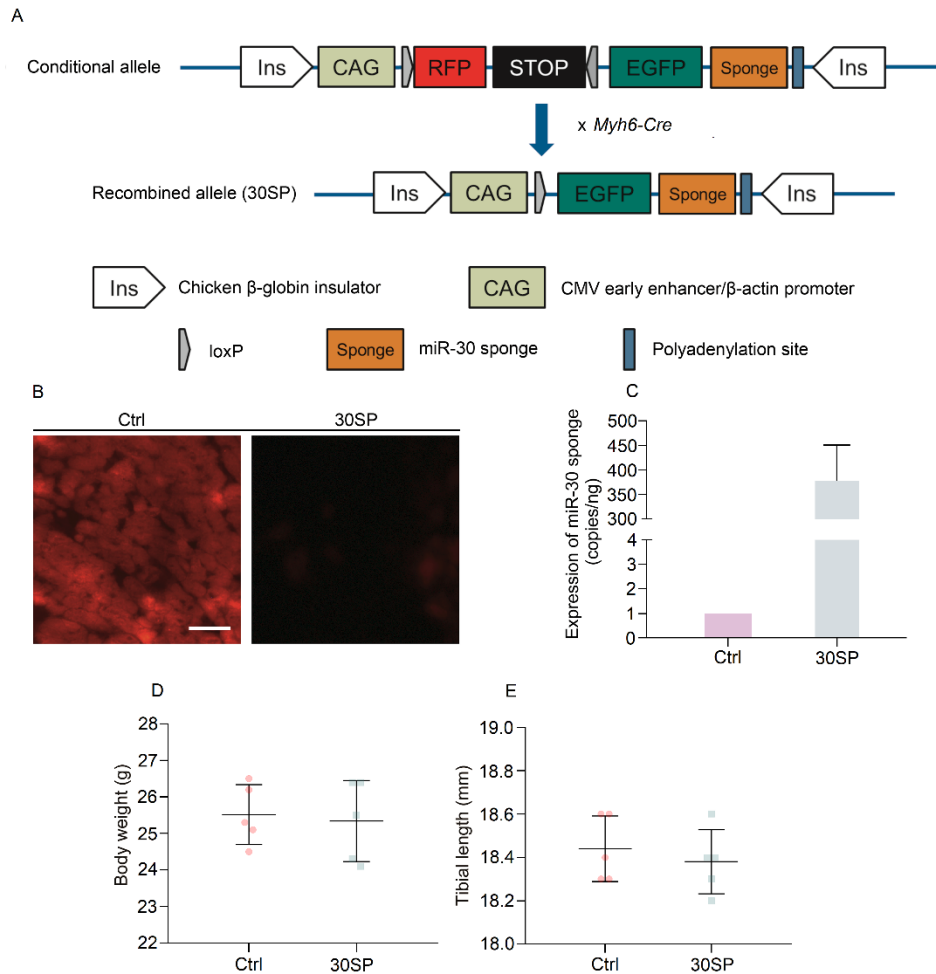

**Supplemental Figure 7. 30SP mice express miR-30 sponge in myocardial tissues**

**successfully.** (A) The structure of the conditional miR-30 sponge transgene and the product of recombination induced by *Myh6-Cre*, which leads to miR-30 sponge expression in cardiomyocytes specifically. (B) Crossing the miR-30 sponge transgenic mice with *Myh6-Cre* transgenic mice results in the loss of RFP expression in cardiomyocytes (original magnification,  $\times 100$ ; scale bar: 100 nm). (C) miR-30 sponge expression in the myocardial tissues from 30SP mice (mean  $\pm$  SD; n = 5 mice per group). (D~E) No significant differences in body weight and tibial length between 30SP mice and ctrl mice. Compared with values for the ctrl, by Two-tailed, unpaired Student's *t* test. Data are shown as mean  $\pm$  SD. n = 5 mice per group.



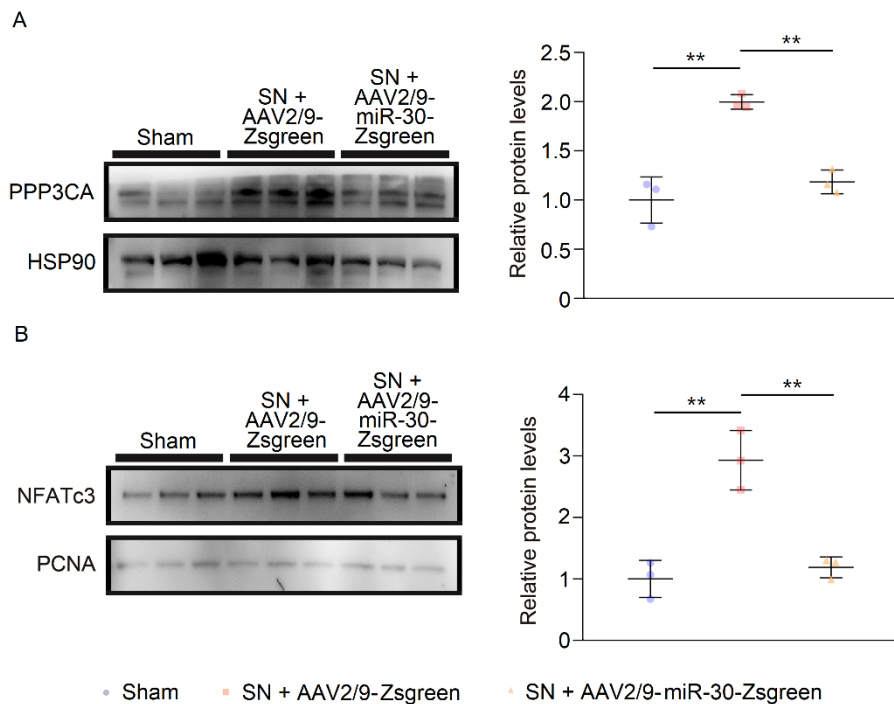

1

2 **Supplemental Figure 8. Cardiac miR-30 rescue inactivates calcineurin signaling**

3 **in CKD. (A)** miR-30 reduces the upregulation of PPP3CA in myocardium from CKD

4 rats. Protein levels are normalized by HSP90. \*\*P<0.01 compared with values

5 indicated by the dashed line, by One-way ANOVA test. Tukey's multiple comparisons

6 test was used for multiple comparison. Data are shown as mean ± SD. n = 3

7 independent experiments per group. **(B)** miR-30 inhibits the nuclear translocation of

8 NFATc3 in myocardium from CKD rats. Protein levels are normalized by PCNA.

9 \*\*P<0.01 compared with values indicated by the dashed line, by One-way ANOVA

10 test. Tukey's multiple comparisons test was used for multiple comparison. Data are

11 shown as mean ± SD. n = 3 independent experiments per group.

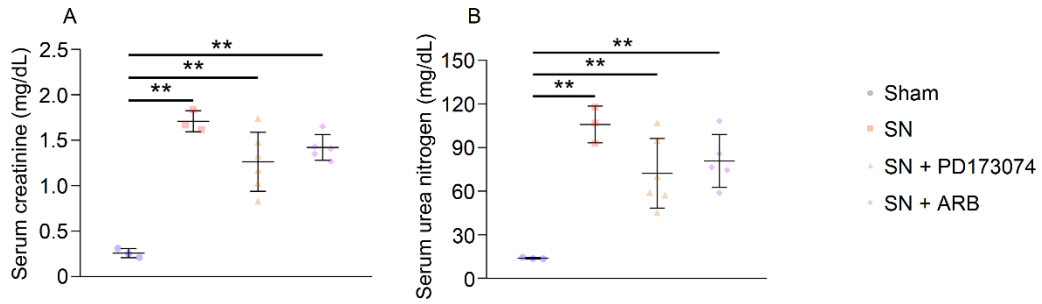

1

2 **Supplemental Figure 9. PD173074 and ARB administration do not affect kidney**

3 **impairment in CKD. (A~B) PD173074 and ARB do not significantly affect serum**

4 creatinine and urea nitrogen in SN rats. \*\*P<0.01 compared with values indicated by

5 the dashed line, by One-way ANOVA test. Tukey's multiple comparisons test was

6 used for multiple comparison. Data are shown as mean ± SD. n = 3 to 6 rats per

7 group.

8

9

10

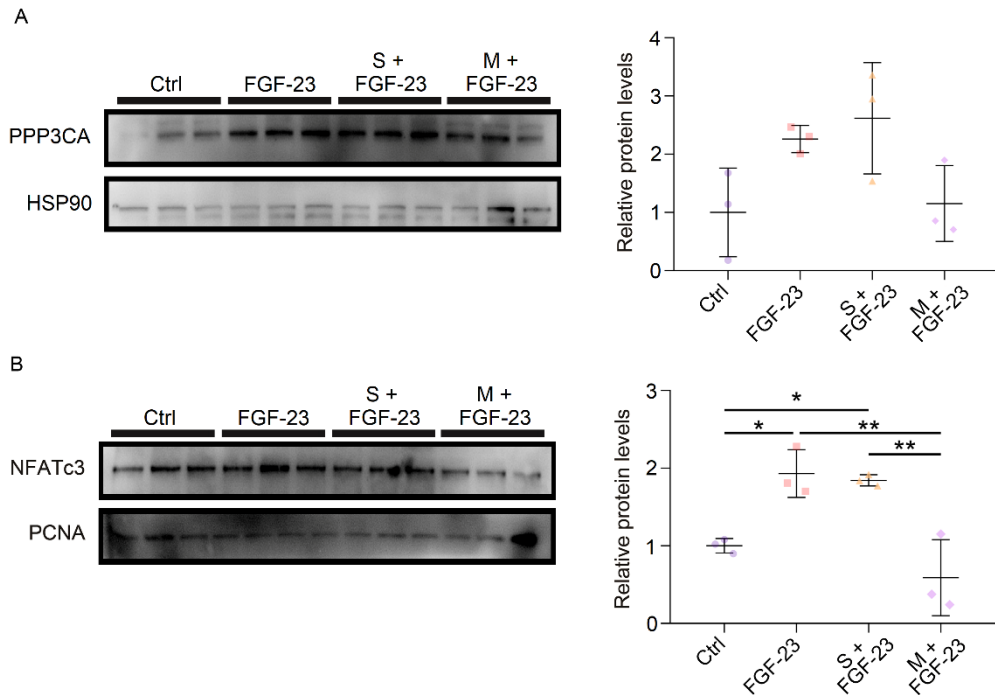

1

2 **Supplemental Figure 10. MiR-30 mimics inactivates calcineurin signaling in**

3 **FGF-23-treated NRVMs. (A)** miR-30 has no significant effect on PPP3CA

4 expression in FGF-23-treated NRVMs. Protein levels are normalized by HSP90.

5 Compared with values by One-way ANOVA test. Tukey's multiple comparisons test

6 was used for multiple comparison. Data are shown as mean  $\pm$  SD. n = 3 independent

7 experiments per group. **(B)** miR-30 inhibits the nuclear translocation of NFATc3 i in

8 FGF-23-treated NRVMs. Protein levels are normalized by PCNA. \*P<0.05 and

9 \*\*P<0.01 compared with values by One-way ANOVA test. Tukey's multiple

10 comparisons test was used for multiple comparison. Data are shown as mean  $\pm$  SD. n

11 = 3 independent experiments per group.

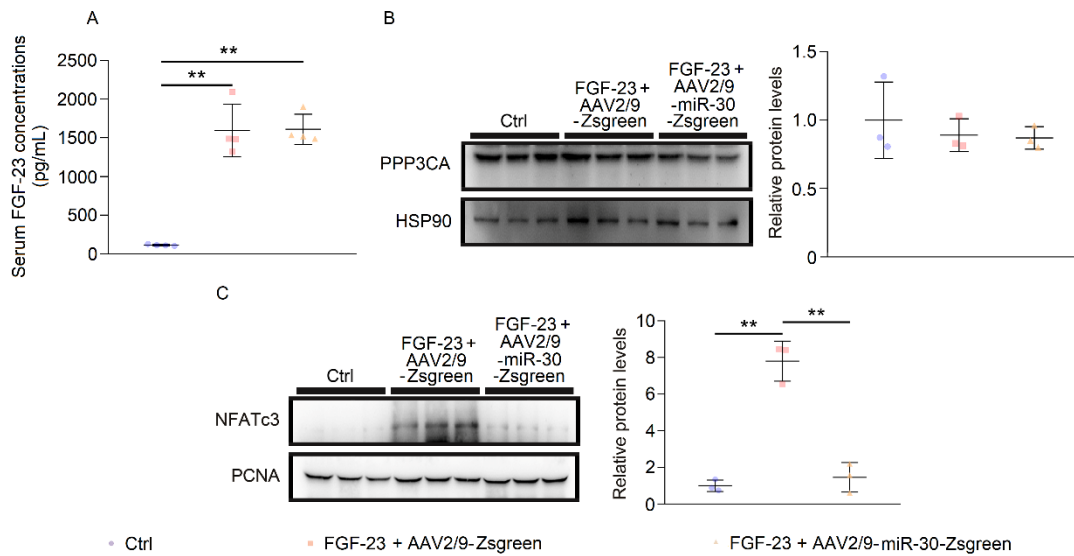

1  
2  
3  
4  
5  
6  
7  
8  
9  
10  
11  
12  
13  
14  
15  
16

**Supplemental Figure 11. Cardiac miR-30 rescue inactivates Calcineurin**

**signaling in FGF-23-treated mice. (A)** AAV2/9 injection does not affect circulating levels of FGF-23 in FGF-23-treated mice. **\*\*P<0.01** compared with values indicated by the dashed line, by One-way ANOVA test. Tukey’s multiple comparisons test was used for multiple comparison. Data are shown as mean ± SD. n = 4 mice per group.

**(B)** MiR-30 rescue has no significant effect on cardiac PPP3CA expression in FGF-23-treated mice. Protein levels are normalized by HSP90. Compared with values by One-way ANOVA test. Tukey’s multiple comparisons test was used for multiple comparison. Data are shown as mean ± SD. n = 3 independent experiments per group.

**(C)** MiR-30 recues inhibits the nuclear translocation of NFATc3 in myocardium from FGF-23-treated mice. Protein levels are normalized by PCNA. **\*\*P<0.01** compared with values by One-way ANOVA test. Tukey’s multiple comparisons test was used for multiple comparison. Data are shown as mean ± SD. n = 3 independent experiments per group.
